# Supplementary material
Source: publisher site journal article supplement (https://www.dovepress.com/get_supplementary_file.php?f=376089.docx)
Supplement: Supplementary file 1 [file get_supplementary_file.php]

**APPENDIX 1**

The following questions explore residents’ experiences with leadership during residency with the goal of determining how to teach residents leadership skills more effectively.

I'll be audio-recording our conversation today so that we can better recall what you said. I will let you know before I start the recorder. After we finish the interview, we will take that recording and transcribe, or type it up, exactly as we hear it so that we are true to your words and thoughts. As a reminder, there are no right or wrong answers and if you’d prefer not to answer a question please let me know and we will move right along. Your participation is voluntary and you may stop the interview at any time. Furthermore, your answers will be kept confidential. If you say anything in the course of the interview which might identify you, like your name or where you live, we would remove that from the transcript. If you mention someone by name or a specific event/location we would remove that as well so that it could not be linked to you. Is it OK if I start the recorder?

First, I would like to ask a few basic demographic questions:
1. Please tell me your age and the gender by which you identify.
2. Can you tell me about any formal leadership training programs that you participated in before residency, if any?
3. Did you have any other work experiences prior to residency? Please describe.
4. Do you have any additional degrees other than MD/DO?

Because we are interviewing residents in lots of different programs, we’d like to get a sense of what your role is on the teams in which you work.
5. Can you compare and contrast the role you have in making clinical decisions in different settings? For example, is your role different when on night-float, inpatient wards, or continuity clinic?

Now, I would like to focus specifically on leadership.
6. When you hear the word “leadership,” what comes to mind?
7. Can you describe the characteristics of someone that you feel is an effective leader?
Clarification Statement: Thanks for sharing your definition with us. By leadership, we mean the ways in which some people bring others together to achieve a goal or greater good. We do not think that leadership is something that a person automatically has because of their title or seniority such as a supervising attending or program leadership. Instead, we think it is a set of qualities that people display. Those qualities include fostering a supportive and inclusive team culture, setting expectations, managing conflict and negotiating, giving and receiving feedback, managing time and delegating well, and helping to develop the skills of others on the team. Please keep this in mind as we move forward.
8. As a resident, what opportunities do you have to act as a leader, if any?
 Probe: Can you give me an example?
9. Do you think of yourself as a leader?
 Probe if yes: Why do you feel that way?
 Probe if no: Can you imagine a time when you would feel like a leader? How is that different from where you are now?
10. What do you think are important leadership skills to have in residency?
 Probe: Why?
11. Please describe a clinical situation that you had as an intern or medical student with an effective resident leader. What skills or characteristics did this person display?
12. Now please describe a clinical situation with an ineffective resident leader. What behaviors or characteristics did this person display?
 Optional Probe: Can you compare and contrast these two experiences?
 Optional Probe: Did you find that the team dynamic, learning, or patient care was affected? If so, please describe.

Now I want to ask you a little bit about leadership training during residency
13. What leadership training does your program currently offer, if any?
 Probe if yes: Is this training mandatory?
14. If you could have more training in leadership skills during residency, what would be most helpful?
 Probe: What would be the most effective way to teach these concepts? For example, didactic lectures, workshops, peer or faculty mentoring? Why?
 Optional Probe: Would you prefer a one-time experience or a longitudinal experience such as peer mentoring or faculty mentoring program. Why or why not?
 Optional Probe: Are there leadership skills that you described above as important, but that you think you’re already getting sufficient training in?
15. Is there anything else you’d like to share about leadership in residency or your leadership experience in general?
